# Supplementary material
Source: Research Square preprint supplement (doi:10.21203/rs.3.rs-9282133/v1)
Supplement: Supplementary file 1 [file 838a391a3d73c1255c702a98.docx]

**Fig. S1 Isolation and identification of FCSCs and CPCs.**

**(A)** Microscopic images of passage 1 (P1) FCSCs and CPCs. **(B)** Flow cytometric analysis of cell surface markers in FCSCs and CPCs (n = 3 biological replicates). **(C)** Colony forming assay of FCSCs and CPCs. n = 5 biological replicates, all data were expressed as the Mean ± SD.
