# Supplementary material
Source: Research Square preprint supplement (doi:10.21203/rs.3.rs-9282133/v1)
Supplement: Supplementary file 2 [file f413302cfe7f8c0e536e5425.docx]

**Table S1** Primer sequences for the genes measured in this experiment.

| gene | Sequence (5′-3′) |
| --- | --- |
| β-Actin | F-GGCAAGTTCAACGGCACAG |
|  | R-CGCCAGTAGACTCCACGACAT |
| GAPDH | F-GGCGAGCCGGGCAGCTCAG |
|  | R-TCTACCAACTTAAATAATTTTTATTAC |
| Dkk3 | F-CTGAGGTGACCCTGTCAAGT |
|  | R-TGTCCACTCTGGTTGTTGGT |
| Sox-9 | F-GCCACCGAACAGACTCACA |
|  | R-ACCCTGAGATTGCCCGGA |
| Col2A1 | F-TGACATTGCACCCATGGACA  R-CCGGACTGTGAGGTTAGGAT |
| Aggrecan | F-ATTTCCACACGCTACACCCTG |
|  | R-TGGATGGGGTATCTGACTGTC |
| Col10A1 | F-GATCATGGAGCTCACGGAAAA |
|  | R-CCGTTCGATTCCGCATTG |
| Col1A1 | F-CTGTGAAGACCCAGACTGCC |
|  | R-TTCTCCTTTCTGCCCCTTTGG |
| OSX  ALP  OCN  PPARG  DAGT  ADIPOQ  PLINH | F-GCCAGTAATCTTCGTGCCAG  R-TAGTGAGCTTCTTCCTGGGGA  F-AGAGGCTGAACCGCAGGAAT  R-CAATGTTTGCTGCTGCTACGA  F-AGACTCCGGCGCTACCTCAAC  R-GGCGTCCTGGAAGCCAATGTG  F-TGCTGGTGATCAGAAGGCTG  R-TGGCATCTCTGTGTCAACCAT  F-TCAGCCTTCTTCCATGAGTACC  R-GGTTCACAATCCAGGCCAGT  F-ATGGTGAGCTGGGTTCTGCTT  R-GTAGCATCCTGAGTCCTGGAACTTT  F-GTGGCTCTCAGCTGCATGT  R-AGGACTCTCTGGAGCACATTCT |
